# Supplementary material
Source: PubMed Central journal article supplement (PMC5535808)
Supplement: NIHMS882353-supplement-Supplemental_INformation.pdf [file NIHMS882353-supplement-Supplemental_INformation.pdf]

# Evaluating Genotoxicity of E-Cigarettes with an Automated 3-D Printed Array

Karteek Kadimisetty,<sup>†</sup> Spundana Malla<sup>†</sup>, Leonardo Silva<sup>‡</sup> and James F. Rusling<sup>†,§,β,\*</sup>

<sup>†</sup> *Department of Chemistry, University of Connecticut, Storrs, CT 06269, USA*

<sup>§</sup> *Department of Cell Biology, University of Connecticut Health Center, Farmington, CT 06032.*

<sup>β</sup> *School of Chemistry, National University of Ireland at Galway, Ireland*

<sup>‡</sup> *Departamento de Química, Universidade Federal de São Carlos, São Carlos, SP, Brazil*

*\*Correspondence should be addressed to J.F.R. ([james.rusling@uconn.edu](mailto:james.rusling@uconn.edu))*

## SUPPORTING INFORMATION

### Table of Contents

|                                                                                    |         |
|------------------------------------------------------------------------------------|---------|
| Chemicals & Reagents                                                               | Page S2 |
| 3D printing specifications                                                         | Page S2 |
| 3D Printed array (Figure S1)                                                       | Page S2 |
| SEM of PG sheets and microwells (Figure S2)                                        | Page S3 |
| Assembled automated array schematic (Figure S3)                                    | Page S3 |
| Schematic Program upload and detailed instructions for PCB integration (Figure S4) | Page S3 |
| Artificial inhalation setup (Figure S5)                                            | Page S4 |
| Reproducibility, Figure S6                                                         | Page S4 |
| Genotoxicity Reactivity in terms of standard carcinogens                           | Page S4 |

## Chemicals & Reagents

**Safety note:** Benzo[a]pyrene (B[a]P), 4-[methyl(nitroso)amino]-1-(3-pyridinyl)-1-butanone (NNK) and N'-Nitroso-2-(3-pyridyl)pyrrolidine (NNN) and their metabolites are potential carcinogens. Handling of these chemicals was done taking protective measures including wearing gloves, safety glasses and working in a hood.

B[a]P (MW 252.31), NNK (MW 207.23), NNN (MW 177.20), poly(diallyldimethylammonium chloride) (PDDA, avg. MW=100,000-200,000), poly(acrylic acid) (PAA, avg. MW= 1800), calf thymus DNA (Type I), and other chemicals were from Sigma Aldrich. Pooled male human liver microsomes were from BD Gentest.  $[\text{Ru}(\text{bpy})_2(\text{PVP})_{10}]^{2+}$   $\{\text{Ru}^{\text{II}}\text{PVP}; (\text{bpy}=2,2\text{-bipyridyl}; \text{PVP}=\text{poly}(4\text{-vinylpyridine)})\}$  was synthesized and characterized as described previously.<sup>[1]</sup> Pyrolytic graphite (PG) sheets are from Panasonic PGS-P13689-ND 70  $\mu\text{m}$  thick.

## 3D printing specifications.

Resin: Formlabs Clear Photopolymer resin FLGPCL02

Printer: Form1+

Resolution: 0.05 mm

Steps

1. Convert 123 design file to printer preform slicer program file format (.preform).
2. Apply orientation and supports to the object.
3. Support specifications: Density 1.5 point size 1.0 mm, no internal supports.
4. Upload the design file to printer and start the print.
5. Post printing
  - a. Remove the printed object from the platform and cut the supports to free the object.
  - b. Flush the channels and the sample chambers with isopropanol and water three times.
  - c. Sanding performed on the devices where the supports were initially present to smooth the surface.
  - d. Dry and spray coat with Krylon colormaster acrylic crystal clear coat and allow to dry for several hours.

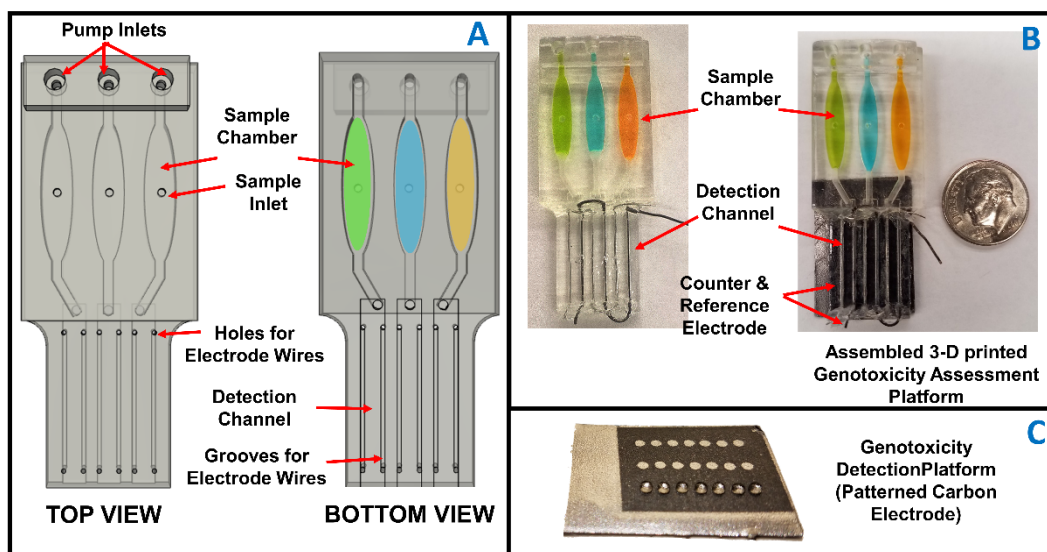

**Figure S1.** 3-D Printed genotoxicity array: (A) CAD design showing top and bottom view of 3-D printed arrays with pump inlets, sample chambers, detection channels and grooves for counter and reference electrodes; (B) Printed, assembled devices showing sample chamber containing dye solutions and electrodes wires inserted; (C) microwell patterned PG detection sheet showing droplet surrounded by hydrophobic boundary.

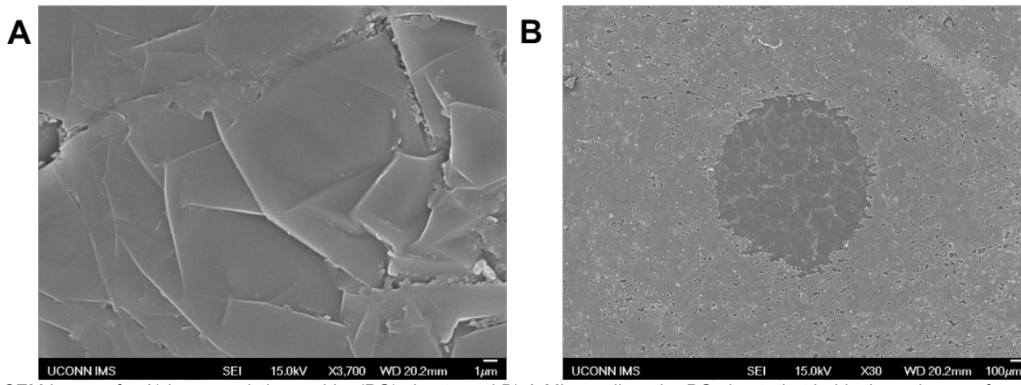

**Figure S2.** SEM images for A) bare pyrolytic graphite (PG) sheets and B) A Microwell on the PG sheet that holds tiny volumes of reagent required to complete layer-by-layer film assembly of enzymes, DNA and RuPVP.

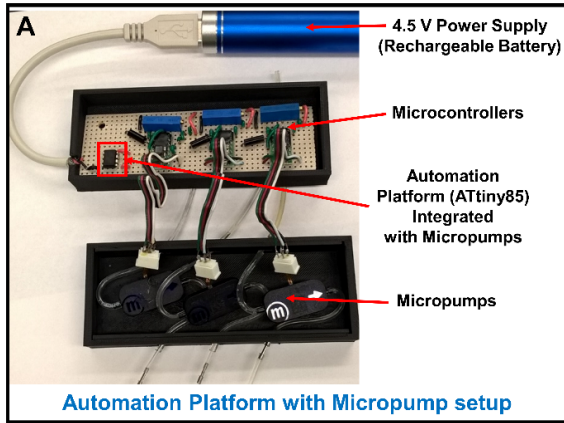

**Figure S3.** Assembled automated array: (A) Automated platform for micropumps showing ATtiny 85 integrated with 4.5 V battery and microcontrollers connected to micropumps that feed the array for the genotoxicity screening assay.

**A**

Pump\_ON\_OFF\_135\_sec\_600\_sec | Arduino 1.6.9

```

1 // the setup function runs once when you press reset or power the board
2 void setup() {
3   // initialize digital pin 3 as an output.
4   pinMode(0, OUTPUT);
5 }
6
7 // the loop function runs over and over again forever
8 void loop() {
9   digitalWrite(0, HIGH); // turn the micropumps on (HIGH is the voltage level)
10  delay(135000); // wait for a 135 second
11  digitalWrite(0, LOW); // turn the micropumps off by making the voltage LOW
12  delay(600000); // wait for a 600 second
13 }
14

```

**B**

A schematic diagram showing an Arduino Uno board connected to a breadboard. The ATtiny85 chip is placed on the breadboard, and its pins are connected to the Arduino board's pins. The connections are color-coded to match the code in part A.

**Figure S4.** A) Arduino program for pumps automation B) Schematic upload of Arduino program to ATtiny85 chip.

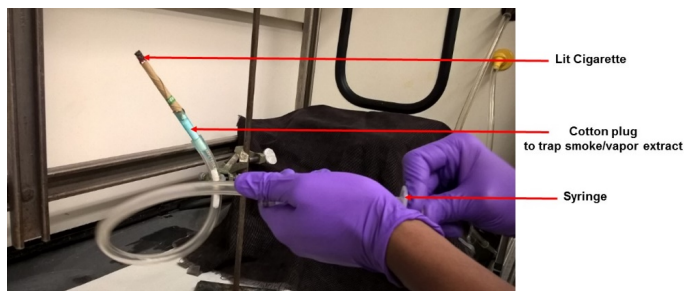

**Figure S5.** Artificial inhalation setup to extract smoke/vapor from cigarettes on to a cotton plug.

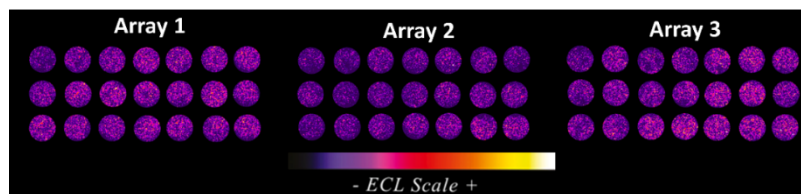

**Figure S6.** Recolorized ECL images from PDDA/PAA/(Ru/DNA)<sub>2</sub>/Ru/Enzyme/DNA films in microwells captured by CCD camera in 10mM phosphate buffer, pH 7.4 upon application of 1.25 V against Ag/AgCl reference electrode for 180 s.

In order to assess the reproducibility of ECL generated between spot to spot and array to array, ECL captured from PDDA/PAA/(Ru/DNA)<sub>2</sub>/Ru/Enzyme/DNA films in 3 different arrays were analyzed upon treatment with 10 mM phosphate buffer and 45s electrolysis followed by 180 s ECL capture. Spot to spot variability of ~ 6 % (n=21 spots) and array to array variability ~7% (n=3) was observed, Figure 3. ECL obtained from 3 different arrays were analyzed by one way analysis of variance, ANOVA and they did not differ statistically at 95 % confidence interval. (p > 0.05)

**Table S1.** Genotoxic reactivity of cigarette sample assessed in terms of known carcinogen concentration.

| Sample             | % ECL  | NNK     |        | NNN     |        | B[a]P   |        |
|--------------------|--------|---------|--------|---------|--------|---------|--------|
|                    |        | [Conc.] | STDEV  | [Conc.] | STDEV  | [Conc.] | STDEV  |
| 1 Tob. Cig         | 23.32  | 45.74   | 2.58   | 26.40   | 1.49   | 45.54   | 2.56   |
| 3 Tob. Cig         | 33.58  | 85.52   | 8.50   | 49.74   | 4.94   | 77.84   | 7.74   |
| 5 Tob. Cig         | 40.46  | 117.76  | 3.36   | 68.77   | 1.96   | 102.37  | 2.92   |
| 1 nf- Tob. Cig     | 24.35  | 49.25   | 3.43   | 28.45   | 1.98   | 48.52   | 3.38   |
| 3 nf- Tob. Cig     | 39.58  | 113.41  | 10.10  | 66.20   | 5.90   | 99.12   | 8.83   |
| 5 nf- Tob. Cig     | 72.57  | 320.99  | 23.45  | 189.80  | 13.86  | 241.63  | 17.65  |
| 20 puff e-cig      | 33.17  | 83.74   | 3.26   | 48.70   | 1.89   | 76.45   | 2.97   |
| 60 puffs e- cig    | 58.11  | 219.19  | 21.79  | 128.99  | 12.82  | 174.28  | 17.33  |
| 100 puffs e-cig    | 84.24  | 414.64  | 35.43  | 245.96  | 21.01  | 300.87  | 25.71  |
| 20 puffs nn e-cig  | 27.48  | 60.61   | 4.04   | 35.11   | 2.34   | 57.96   | 3.87   |
| 60 puffs nn e-cig  | 39.47  | 112.84  | 3.17   | 65.86   | 1.85   | 98.70   | 2.78   |
| 100 puffs nn e-cig | 42.71  | 129.25  | 6.47   | 75.56   | 3.78   | 110.86  | 5.55   |
| 1 e-cig cartridge  | 98.53  | 542.60  | 44.94  | 322.95  | 26.75  | 378.81  | 31.37  |
| 3 e-cig cartridges | 166.15 | 1330.50 | 169.94 | 800.78  | 102.28 | 816.67  | 104.31 |
| 5 e-cig cartridges | 218.43 | 2127.83 | 209.67 | 1288.16 | 126.93 | 1220.95 | 120.31 |

Abbrev.: Tob.=tobacco; nf=non-filtered; nn= non-nicotine

## Reference

[1] L. Dennany, R. J. Forster, J. F. Rusling, *J. Am. Chem. Soc.*, **2003**, 125, 5213-5218.
